# Supplementary material for: New Poly(N-isopropylacrylamide-butylacrylate) Copolymer Biointerfaces and Their Characteristic Influence on Cell Behavior In Vitro
Source: MDPI journal article supplement (doi:10.3390/ijms23073988), 2022-04-03
Supplement: s1 [file s1]

# New Poly(N-isopropylacrylamide-butylacrylate) Copolymer Biointerfaces and Their Characteristic Influence on Cell Behavior In Vitro

Nicoleta-Luminita Dumitrescu <sup>1</sup>, Madalina Icriverzi <sup>2</sup>, Anca Bonciu <sup>3,4</sup>, Paula Florian <sup>2</sup>, Antoniu Moldovan <sup>1</sup>, Anca Roseanu <sup>2</sup>, Laurentiu Rusen <sup>1,\*</sup>, Valentina Dinca <sup>3,\*</sup> and Florin Grama <sup>5,6</sup>

<sup>1</sup> Lasers Department, National Institute for Lasers, Plasma, and Radiation Physics, 409 Atomistilor Street, 077125 Magurele, Romania; nicoleta.dumitrescu@inflpr.ro (N.-L.D.); antoni.moldovan@inflpr.ro (A.M.)

<sup>2</sup> Ligand-Receptor Interactions Department, Institute of Biochemistry of the Romanian Academy, 060031 Bucharest, Romania; radu\_mada@yahoo.co.uk (M.I.); florian\_paula@yahoo.com (P.F.); roseanua@gmail.com (A.R.)

<sup>3</sup> FOTOPLASMAT Department, National Institute for Lasers, Plasma, and Radiation Physics, 409 Atomistilor Street, 077125 Magurele, Romania; anca.bonciu@inflpr.ro

<sup>4</sup> Faculty of Physics, University of Bucharest, 405 Atomistilor, 077125 Magurele, Romania

<sup>5</sup> Department of General Surgery, Colțea Clinical Hospital, 1 I.C. Brătianu Street, 030171 Bucharest, Romania; florin.grama@umfcd.ro

<sup>6</sup> Carol Davila University of Medicine & Pharmacy, 37 Dionisie Lupu Street, 030171 Bucharest, Romania

\* Correspondence: laurentiu.rusen@inflpr.ro (L.R.); valentina.dinca@inflpr.ro (V.D.)

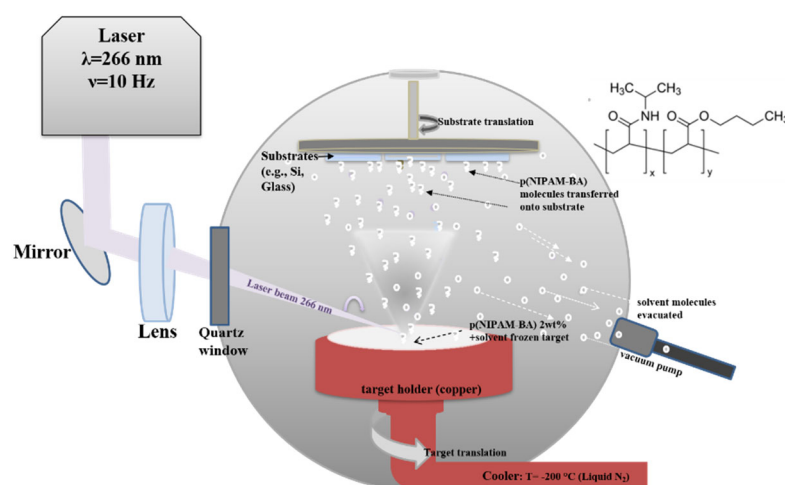

**Figure S1.** Experimental scheme of MAPLE method.

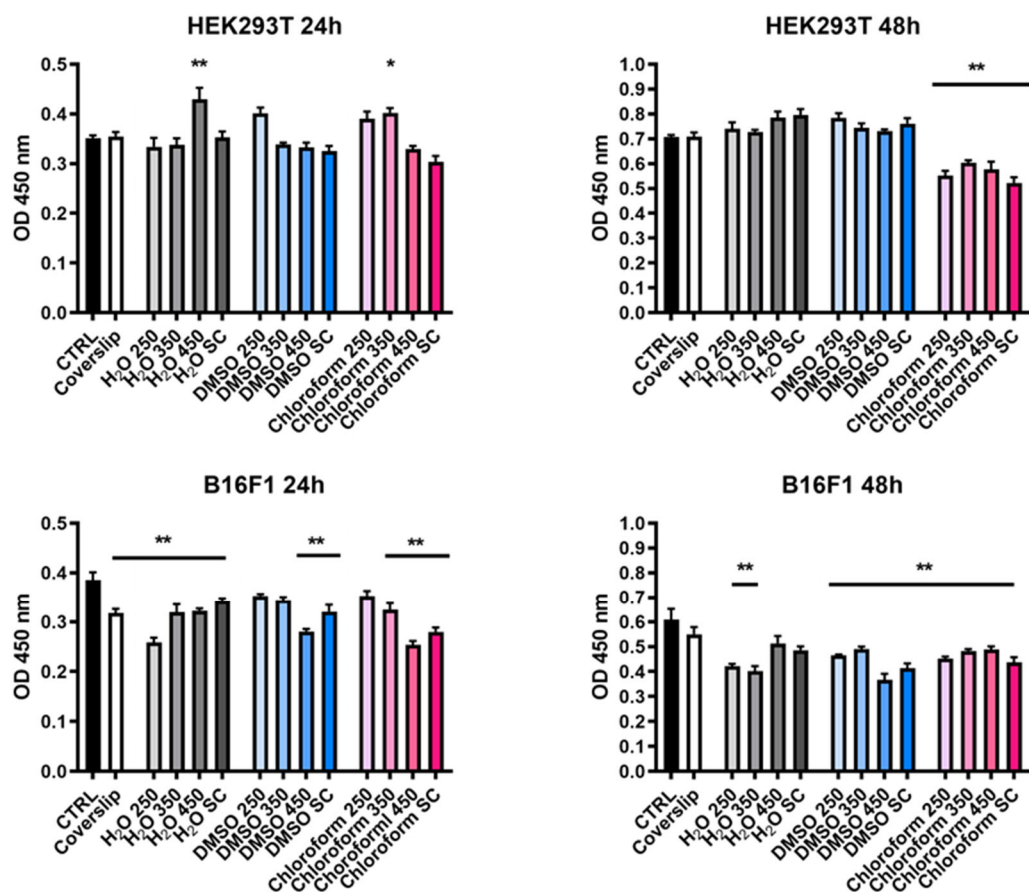

**Figure S2.** Viability of HEK 293T and B16-F1 cells grown on different biomaterials for 24 and 48 h was determined by MTS assay. The results are expressed as mean values of OD 450  $\pm$  standard deviation ( $n = 6$ ); \*  $p < 0.05$  and \*\*  $p < 0.01$  vs. CTRL (glass). The fluences were expressed as mJ/cm<sup>2</sup>.
